# Supplementary material for: A novel mechanism of post-translational modulation of HMGA functions by the histone chaperone nucleophosmin
Source: PubMed Central journal article supplement (PMC4339810; doi:10.1038/srep08552), 2015-02-25
Supplement: srep08552-s1.pdf [file srep08552-s1.pdf]

**A novel mechanism of post-translational modulation of HMGA functions by the histone chaperone nucleophosmin.**

Laura Arnoldo<sup>1,#</sup>, Riccardo Sgarra<sup>1,#</sup>, Eusebio Chiefari<sup>2</sup>, Stefania Iiritano<sup>2</sup>, Biagio Arcidiacono<sup>2</sup>, Silvia Pegoraro<sup>1</sup>, Ilenia Pellarin<sup>1</sup>, Antonio Brunetti<sup>2</sup>, and Guidalberto Manfioletti<sup>1,\*</sup>

<sup>1</sup> Department of Life Sciences, University of Trieste, Trieste, 34127, Italy

<sup>2</sup> Department of Health Sciences, University "Magna Græcia" of Catanzaro, Catanzaro, 88100, Italy.

# These authors contributed equally to this work.

\* Correspondence and request for materials should be addressed to G.M. (manfiolo@units.it)

## SUPPLEMENTARY METHODS

### Immunofluorescence analyses

HepG2 cells were grown on glass slides and fixed with PFA 4%. After permeabilization with 0.3% Triton/PBS and saturation in 0.5% BSA/PBS, cells were incubated for 1 hour at RT with primary antibodies diluted in 0.5% BSA/PBS. Secondary antibodies were applied for 1 hr at RT, and the cells then were stained with Hoechst. The  $\alpha$ -NPM1 antibody was a monoclonal antibody purchased from Abcam (# ab10530). The  $\alpha$ -HMGA1 antibody was a polyclonal antibody developed in our laboratory. The images were visualized by a Nikon Eclipse e800 microscope and acquired by Nikon ACT-1 software.

### GST pull-down assays

GST pull-down experiments were performed using GST, GST-NPM1, and GST-NPM1 117-186 and recombinant HA-tagged HMGA1a and HMGA2 proteins essentially as already described (19). Bound HMGA proteins were detected by western-blot using an  $\alpha$ -HA antibody (Sigma).

GST pull-down experiments in the presence of ethidium bromide were performed essentially as already described (19) using recombinant GST, GST-HMGA1b, and GST-HMGA2 and *in vitro* transcribed and translated NPM1.

GST pull down experiments in the presence of DNase I were performed essentially as already described (19) using recombinant GST and GST-NPM1 1-295 and recombinant HMGA1a and HMGA2 proteins in the presence of 8.5 U/mL DNase I (Invitrogen – cat. n°18068-015). The binding buffer was slightly modified accordingly to DNase I requirements (Binding buffer: 25 mM Hepes pH 7.9, 50 mM KCl, 2 mM MgCl<sub>2</sub>, 1 mM DTT, 0.01% NP40). To check for the presence of DNA in the GST-pull down experiments, after the last washing step of the GST-pull down protocol, the Glutathione Sepharose<sup>TM</sup> 4B resins (carrying proteins and eventually also contaminating DNA) were incubated with a SDS-containing DNA loading buffer (1.6 mM TrisHCl pH 7.6, 0.005 Bromophenol blue, 0.005 Xylene cyanol FF, 10 % Glycerol, 10 mM EDTA, and 0.17% SDS), heated at 65 °C for 10 minutes to eliminate DNA-protein interactions, and chilled on ice. Equivalent amounts of samples with respect to the protein analyses have been loaded on a native TBE PAGE (T=10%). Increasing quantities (15, 30, 60, 120 ng) of a reference 100 bp DNA ladder (Quick-Load 100 bp DNA ladder – New England Biolabs Inc.) were loaded on the same gel. DNA was visualized by conventional Ethidium Bromide staining.

### ChIP

Primers used in ChIP assays:

| PCR                 | Sequence (5'–3')     | Size   | Accession n. |
|---------------------|----------------------|--------|--------------|
| IGFBP-1 AT-rich for | CAGAAAGAGAAGCAATTCCG | 720 bp | NC_000007.14 |

|                       |                         |        |              |
|-----------------------|-------------------------|--------|--------------|
| IGFBP-1 AT-rich rev   | TACCAGCCAGACGCGAGCAA    |        |              |
| INSR AT-rich for      | AGATCTGGCCATTGCACTC     | 377 bp | NC_000019.10 |
| INSR AT-rich rev      | ATGCCAGTTCTGGGGAGGTA    |        |              |
| IGFBP-1 noAT-rich for | AGTAGAGATGGGGTTTTGCC    | 264 bp | NC_000007.14 |
| IGFBP-1 noAT-rich rev | GATAGCAATGCCTTCTTG TG   |        |              |
| INSR noAT-rich for    | TCCCCTGCAAGCTTTCCCTC    | 383 bp | NC_000019.10 |
| INSR noAT-rich rev    | TACTGAGCGGAGGCCCTTGCGGT |        |              |

### qPCR

|                       |                       |        |              |
|-----------------------|-----------------------|--------|--------------|
| IGFBP-1 AT-rich for   | ACTGGACTTTAACTGAGGG   | 260 bp | NC_000007.14 |
| IGFBP-1 AT-rich rev   | ATGCTCGCTGGATGGGATG   |        |              |
| INSR AT-rich for      | AGATCTGGCCATTGCACTC   | 240 bp | NC_000019.10 |
| INSR AT-rich rev      | AAACCTATTCCTGCCTCTGGG |        |              |
| IGFBP-1 noAT-rich for | AGTAGAGATGGGGTTTTGCC  | 264 bp | NC_000007.14 |
| IGFBP-1 noAT-rich rev | GATAGCAATGCCTTCTTG TG |        |              |
| INSR noAT-rich for    | TCCCCTGCAAGCTTTCCCTC  | 136 bp | NC_000019.10 |
| INSR noAT-rich rev    | TGCTCGGGCCCGTAAACAAC  |        |              |

Supplementary Figure S1 - Arnaldo et al.

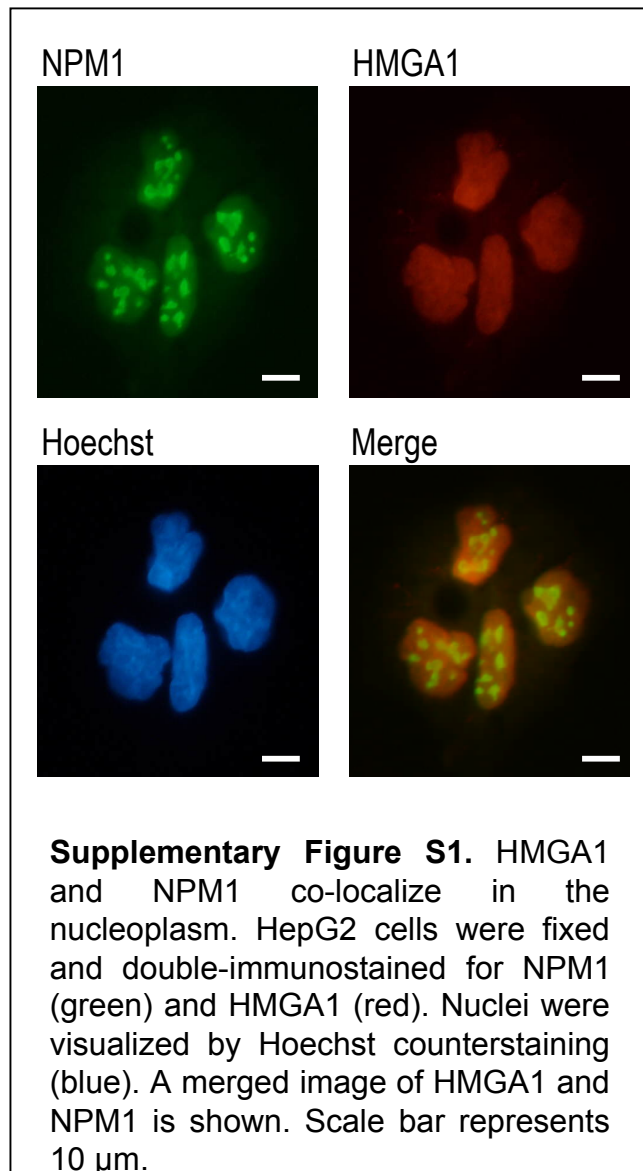

Supplementary Figure S2 – Arnaldo et al.

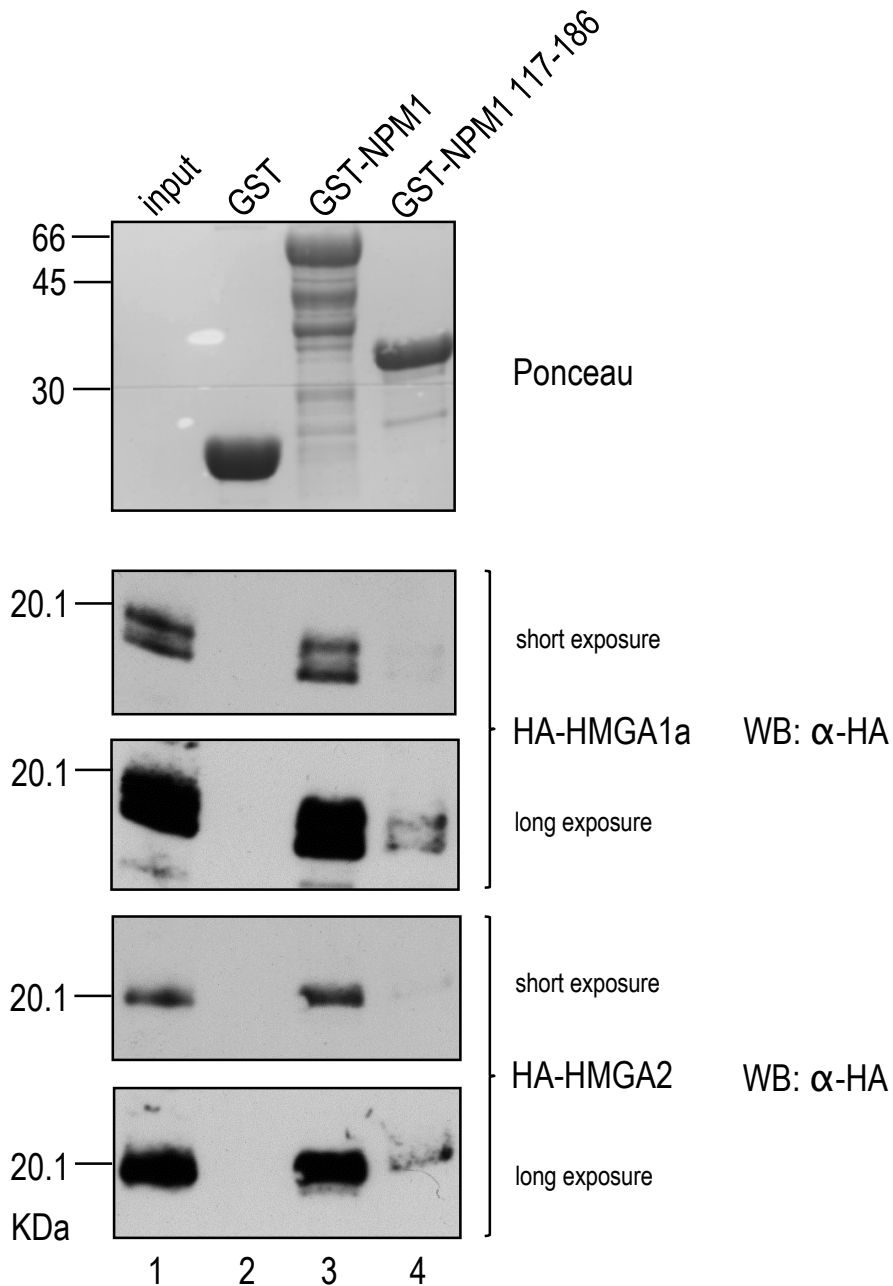

**Supplementary Figure S2.** NPM1 has almost the same binding affinity towards HMGA1a and HMGA2. Protein-protein interaction mapping experiment performed with GST pull-down assays using GST-fused NPM1 forms (full length 1-295 and 117-186) and recombinant HA-tagged HMGA1a and HMGA2 proteins. Bound proteins were visualized by western-blot using  $\alpha$ -HA antibodies. GST was used as negative control. A representative red ponceau stained membrane is shown to verify the amount and integrity of the GST fusion proteins used. Two different exposure times (long and short) are shown.

### Supplementary Figure S3 - Arnolde et al.

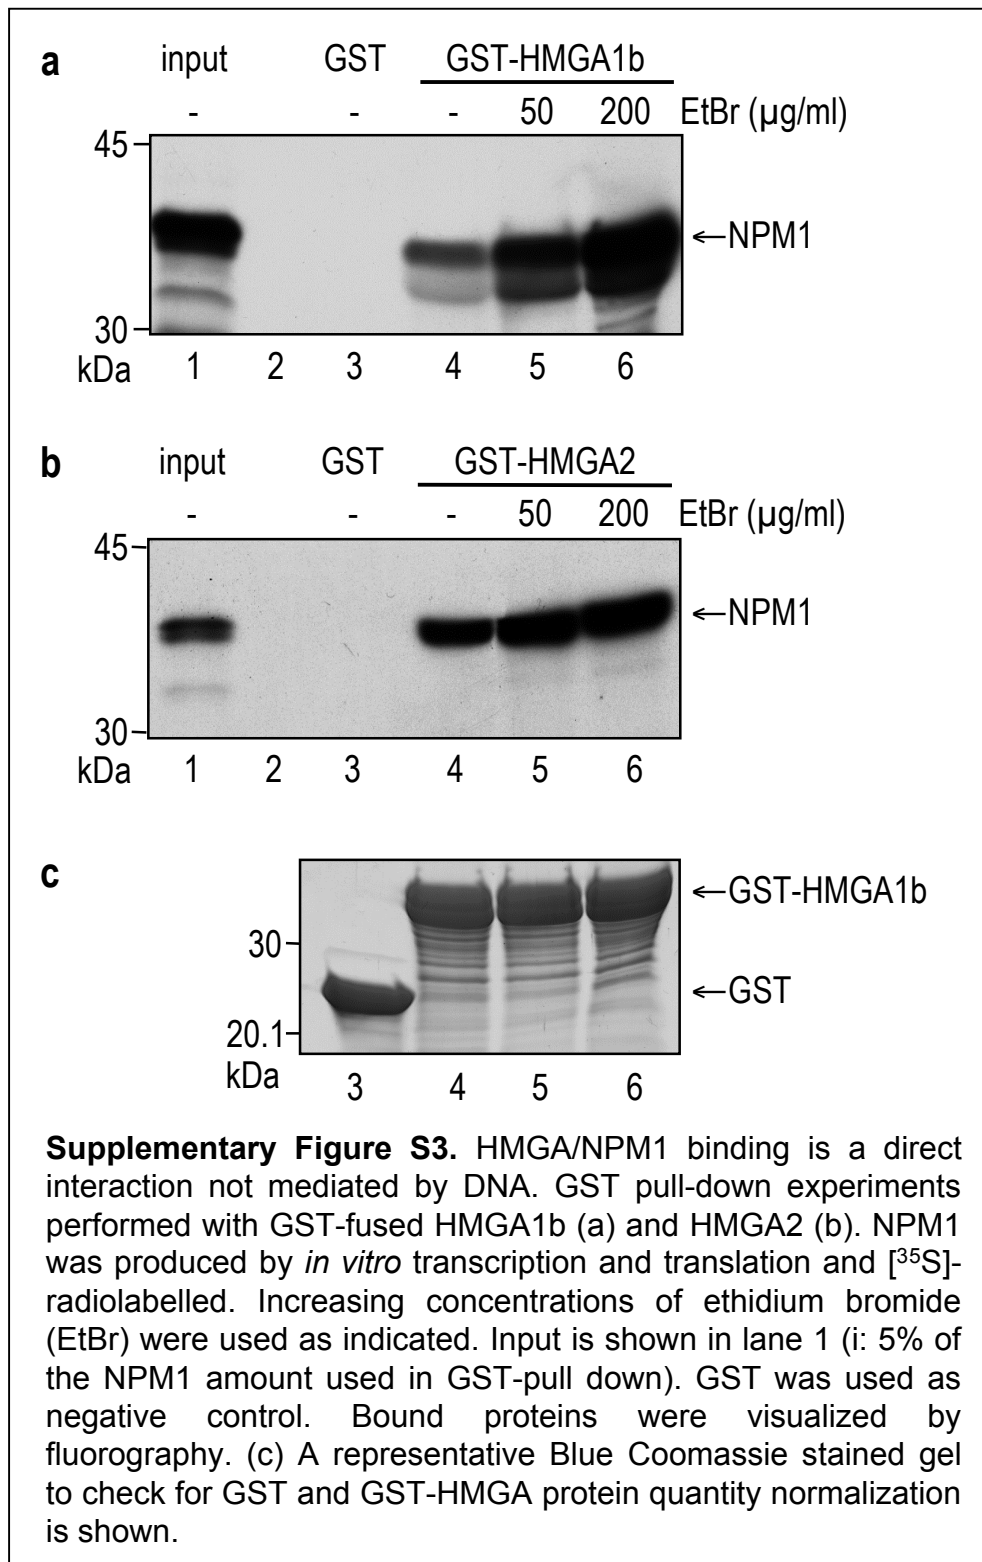

Supplementary Figure S4 - Arnaldo et al.

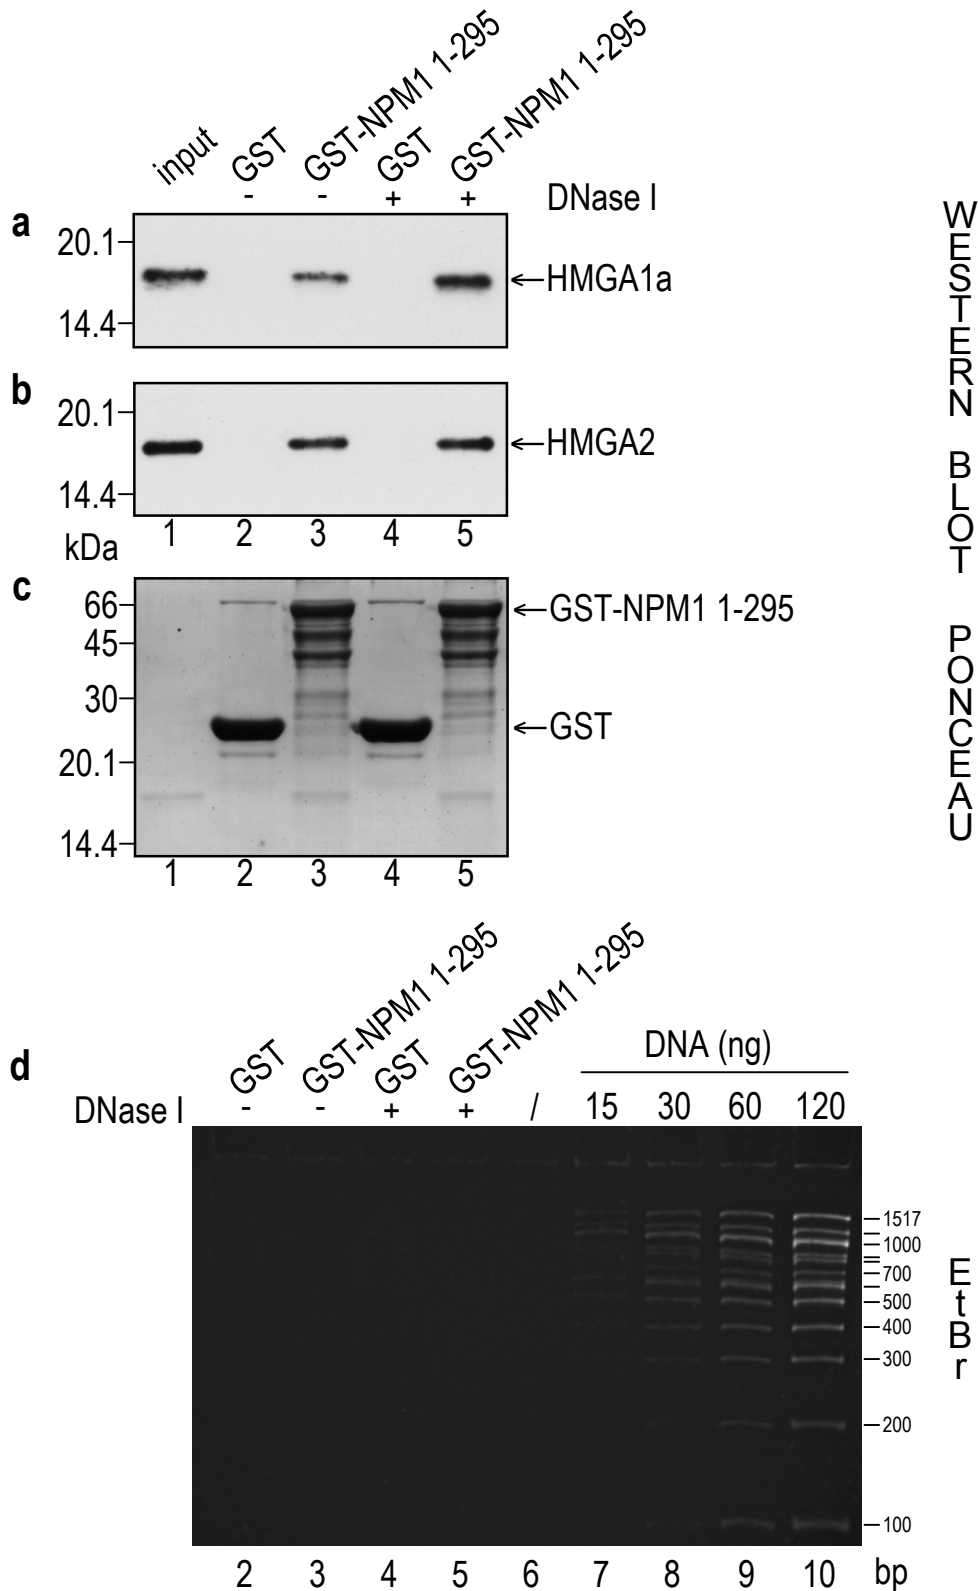

**Supplementary Figure S4.** HMGA/NPM1 binding is a direct interaction not mediated by DNA. GST pull-down experiments performed with recombinant HMGA1a (a) and HMGA2 (b). NPM1 1-295 was produced as a GST-fused protein and GST was used as a negative control. GST pull downs were performed in the presence (+) or absence (-) of DNase I (1.7 U/200  $\mu$ L). Input is shown in lane 1 (i: 100% of the HMGA recombinant proteins amount used in GST-pull down - 0.1  $\mu$ g). Bound proteins were visualized by western blot using  $\alpha$ -HMGA1 or  $\alpha$ -HMGA2 specific antibodies. (c) A representative ponceau stained nitrocellulose membrane to check for GST and GST-NPM1 1-295 protein quantity normalization is shown. (d) A representative Ethidium Bromide stained native TBE PAGE (T=10%) to check for the presence of DNA into GST-pull down assays (lanes 2-5). In lanes 7-10 different quantities of a 100 base pair DNA ladder are loaded (12 bands for a total of 15, 30, 60, and 120 ng; from the top the markers are: 1517, 1200, 1000, 900, 800, 700, 600, 500, 400, 300, 200, 100 bp).
